# Supplementary material for: Comparing the new Ifakara Ambient Chamber Test with WHO cone and tunnel tests for bioefficacy and non-inferiority testing of insecticide-treated nets
Source: Springer Nature journal article supplement (doi:10.1186/s12936-019-2741-y), 2019-04-30
Supplement: MOESM2 [file 16688238]

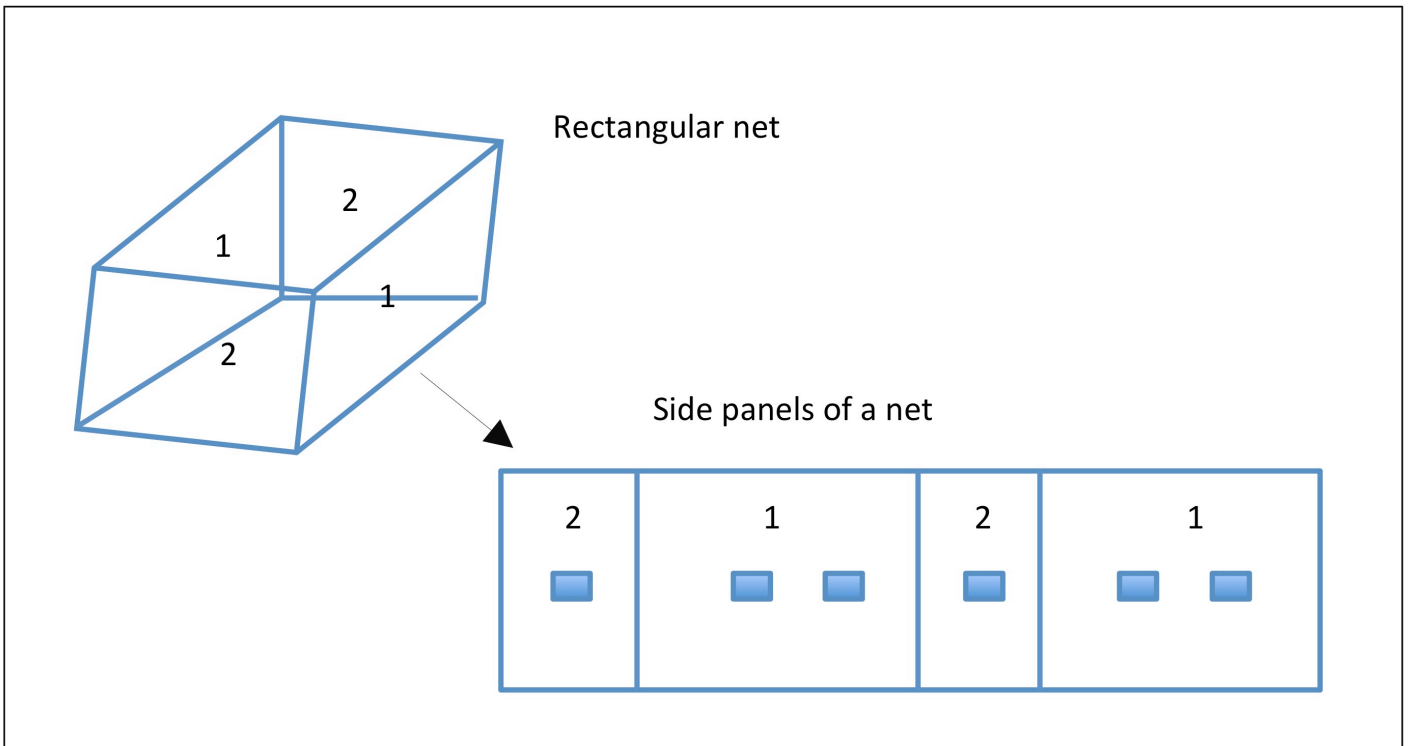

Figure 2
